# Supplementary material for: Variation in global distribution, population structures, and demographic history for fourTrichiuruscutlassfishes
Source: PeerJ journal article supplement (doi:10.7717/peerj.12639), 2021-12-15

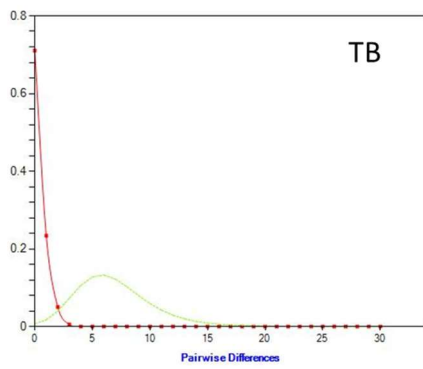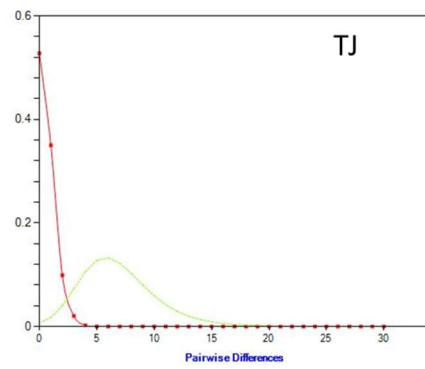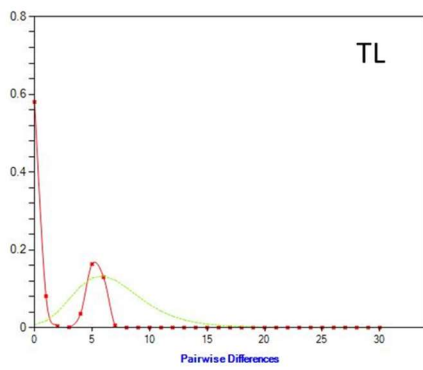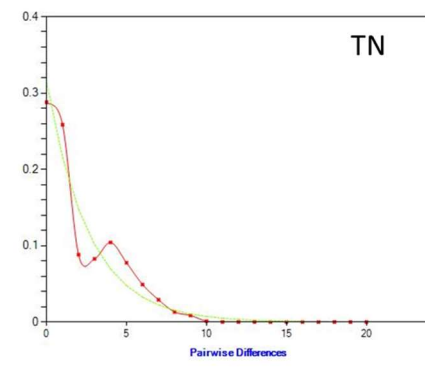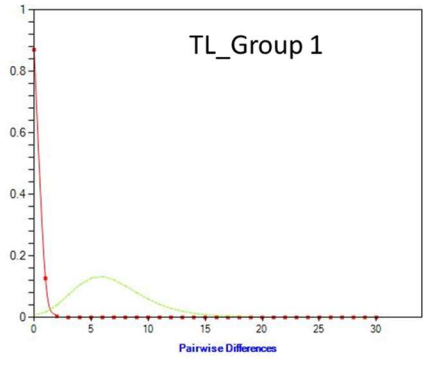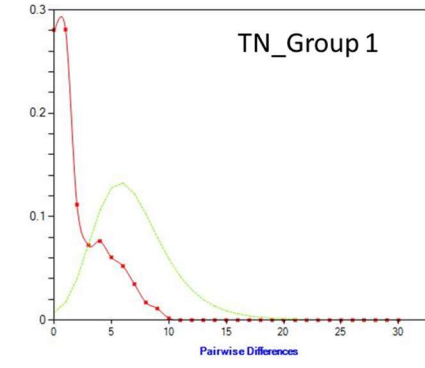

Supplement: FigS1_mismatch.pdf [file FigS1_mismatch.pdf]
