# Supplementary material for: Variation in global distribution, population structures, and demographic history for four Trichiurus cutlassfishes
Source: PeerJ. 2021 Dec 15;9:e12639. doi: 10.7717/peerj.12639 (PMC8684317; doi:10.7717/peerj.12639)
Supplement: Supplemental Information 1 [file peerj-09-12639-s001.xlsx]

## Sheet: GenBank sequences all
GenBank sequences of the five cutlassfish species included for analyses in this study.
	GenBank accession number	Sampling site from original reference	Sampling site assigned in this study
T. brevis	DQ643037.1	China: South China Sea	CH_SCS
T. japonicus	AB197142.1	southern Japan: Miyazaki	JP
	AB197142.1	southern Japan: Nagasaki	JP
	AB197143.1	southern Japan: Nagasaki	JP
	AB197144.1	southern Japan: Chiba	JP
	AB197145.1	southern Japan: Chiba	JP
	AB197146.2	southern Japan: Miyazaki	JP
	AB200989.1	Japan	JP
	AY216492.1	China: Rongcheng	CH_SD
	AY216493.1	China: Rongcheng	CH_SD
	AY216494.1	China: Rongcheng	CH_SD
	EU339148.1	China: Yellow Sea	CH_YS
	JQ349010.1	China: Chinese coastal waters	CH
	JQ349011.1	China: Yellow Sea	CH_YS
	JQ349012.1	China: South China Sea	CH_SCS
	JQ349013.1	China: South China Sea	CH_SCS
	JQ349014.1	China: South China Sea	CH_SCS
	JQ349015.1	China: Yellow Sea	CH_YS
	JQ349016.1	China: East China Sea	CH_ECS
	JQ349017.1	China: East China Sea	CH_ECS
	JQ349018.1	China: East China Sea	CH_ECS
	JQ349019.1	China: East China Sea	CH_ECS
	JQ349020.1	China: Yellow Sea and South China Sea	CH
	JQ349021.1	China: Yellow Sea and South China Sea	CH
	JQ349022.1	China: Chinese coastal waters	CH
	JQ349023.1	China: Yellow Sea	CH_YS
	JQ349024.1	China: Yellow Sea and South China Sea	CH
	JQ349025.1	China: Yellow Sea	CH_YS
	JQ349026.1	China: Yellow Sea and East China Sea	CH
	JQ349027.1	China: Yellow Sea and East China Sea	CH
	MF150496.1	China	CH
	MF150497.1	China	CH
	MF150498.1	China	CH
	MF150499.1	China	CH
	MF150500.1	China	CH
	MF150501.1	China	CH
	MF150502.1	China	CH
	MF150503.1	China	CH
	MF164468.1	China: East and South China Seas	CH
	MF164469.1	China: East and South China Seas	CH
	MF164470.1	China: South China Sea	CH_SCS
	MF164471.1	China: East China Sea	CH_ECS
	MF164472.1	China: East China Sea	CH_ECS
	MF164473.1	China: East China Sea	CH_ECS
	MF164474.1	China: East China Sea	CH_ECS
	MF164475.1	China: East China Sea	CH_ECS
	MF164476.1	China: East China Sea	CH_ECS
	MF164477.1	China: East China Sea	CH_ECS
	MF164478.1	China: East China Sea	CH_ECS
	MF164479.1	China: East China Sea	CH_ECS
	MF164480.1	China: East China Sea	CH_ECS
	MF164481.1	China: East China Sea	CH_ECS
	NC_011719.1	China: Yellow Sea	CH_YS
T. lepturus	AB197147.1	Atlantic Ocean: Western Atlantic (USA)	US_E
	AB197148.1	Atlantic Ocean: Western Atlantic (Pascagoula, Gulf of Mexico )	MX
	AB197148.1	Atlantic Ocean: Western Atlantic (Brazil, South America)	BR
	AB197149.1	Atlantic Ocean: Western Atlantic (Brazil, South America )	BR
	AB198977.1	West coast of Africa (Gabon)	AF
	AB198977.1	West coast of Africa (Angola)	AF
	AB198977.1	West coast of Africa (Bissau)	AF
	AB198977.1	West coast of Africa (Benin)	AF
	AB198978.1	West coast of Africa (Gabon)	AF
	AB198979.1	West coast of Africa (Angola)	AF
	AB198980.1	West coast of Africa (Angola)	AF
	AB198981.1	West coast of Africa (Bissau)	AF
	AB198982.1	West coast of Africa (Guinea)	AF
	AB201821.1	Atlantic Ocean: Western Atlantic coast of America	US_E
	DQ532974.1	USA: California	US_W
	JN012087.1	China: South China Sea	CH_SCS
	JN012088.1	China: South China Sea	CH_SCS
	JN012089.1	China: South China Sea	CH_SCS
	JN012090.1	China: South China Sea	CH_SCS
	JN012091.1	China: South China Sea	CH_SCS
	JN012092.1	China: South China Sea	CH_SCS
	JN012093.1	China: South China Sea	CH_SCS
	JN012094.1	China: South China Sea	CH_SCS
	JN012095.1	China: South China Sea	CH_SCS
	JN012096.1	China: South China Sea	CH_SCS
	JN012097.1	China: South China Sea	CH_SCS
	JQ939010.1	North Carolina (USA)	US_E
	KC905131.1	Iran (Chahbahar)	OM
	KC905132.1	Iran (Chahbahar)	OM
	KC905136.1	Iran (Chahbahar)	OM
T. nanhaiensis	AB125746.1	Japan (Miyazaki)	JP
	AB125746.1	Japan (Okinawa)	JP
	AB200990.1	Japan (Miyazaki)	JP
	AB200990.1	Japan (Okinawa)	JP
	AB212875.1	China: Hainan	CH_SCS
	AB212876.1	China: Hainan	CH_SCS
	AB212877.1	China: Hainan	CH_SCS
	AB212878.1	China: Hainan	CH_SCS
	AB212879.1	Indonesia: Jakarta	IN
	AB212880.1	Indonesia: Jakarta	IN
	AB212881.1	Oman: Muscat	OM
	AB212882.1	Oman: Muscat	OM
	AB212883.1	Oman: Muscat	OM
	AB212884.1	Oman: Muscat	OM
	AB212885.1	Pakistan	PK
	AB212886.1	Pakistan: Karachi	PK
	AB212887.1	Pakistan: Karachi	PK
	AB212888.1	Thailand: Phuket	TH
	JN165226.1	China: South China Sea	CH_SCS
	JN165227.1	China: South China Sea	CH_SCS
	JN165228.1	China: South China Sea	CH_SCS
	JN165229.1	China: South China Sea	CH_SCS
	JX477078.1	China: Sanya County, Hainan Province	CH_SCS
	KC307770.1	Iran: Persian Gulf_Hengam	PS
	KC905130.1	Iran (Bushehr)	PS
	KC905133.1	Iran (Bushehr)	PS
	KC905134.1	Iran (Bushehr)	PS
	KC905135.1	Iran (Bushehr)	PS
	KR824530.1	Pakistan	PK
	LC061438.1	Iran: Persian Gulf	PS
	LC061439.1	Iran: Persian Gulf	PS
	LC061440.1	Iran: Oman Sea	OM
	LC061441.1	Iran: Oman Sea	OM

## Sheet: GenBank seq for phylogeny
GenBank sequences used for phylogenetic tree reconstruction in this study.
Species	GenBank Accession number
Seven trichiurids
Assurger anzac	AP012508
Aphanopus carbo	AP012944
Aphanopus arigato	KJ010571
Benthodesmus tenuis	AP012522
Eupleurogrammus muticus	MW898456-8
Evoxymetopon poeyi	AP012509
Lepidopus caudatus	AF100917-19, GU94670
Tentoriceps cristatus	KU878648, KU878649
Three non-trichiurid scombroids
Prometichthys prometheus	AP012504
Thyrsitoides marleyi	AP012505
Scombrolabrax heterolepis	AP012517

## Sheet: Haplotype
Haplotype information of the four cutlassfish species analyzed in this study. Number in parenthese is the frequency from each site.
	GenBank accession number	Haplotype number	Sampling sites	Group
T. brevis	MW898566	1	CH_QD (40), CH_ZH (1), CH_XM (34), CH_GD (11)
	MW898567	2	CH_QD (1)
	MW898568	3	CH_QD (2), CH_ZH (1)
	MW898569	4	CH_SCS (1)
	MW898570	5	CH_XM (1), CH_GD (1)
	MW898571	6	CH_QD (1), CH_XM (1)
	MW898572	7	CH_QD (1)
	MW898573	8	CH_XM (1)
	MW898574	9	CH_XM (1)
	MW898575	10	CH_XM (1)
	MW898576	11	CH_XM (1)
	MW898577	12	CH_XM (1)
	MW898578	13	CH_XM (1)
T. japonicus	MW898474	1	JP (5), CH_DL (6), CH_SD (1), CH_SD (10), CH_QD (5), CH_YS (4), CH_ZH (111), CH_SCS (1), CH (4), TW_GE (21), TW_D (36), TW_K (38), TW_ E (42), TW_FG (9), TW_T (229), TW_KDG (109)
	MW898475	2	CH_SD (1), CH_ZH (3), CH_ECS (1), TW_GE (1), TW_D (2), TW_ E (1), TW_T (2), TW_KDG (3)
	MW898476	3	CH_DL (1), CH_ZH (3), CH_ECS (1), CH (2), TW_GE (1), TW_K (2), TW_ E (2), TW_T (7), TW_KDG (5)
	MW898477	4	CH_DL (1), CH_ZH (6), CH_SCS (1), TW_ E (3), TW_T (3)
	MW898478	5	JP (6), CH_ZH (2), TW_D (2), TW_KDG (1)
	MW898479	6	CH_SD (1)
	MW898480	7	CH_SD (1), CH_ZH (2), CH_ECS (1), CH (1), TW_D (2), TW_K (2), TW_T (4), TW_KDG (6)
	MW898481	8	TW_D (1)
	MW898482	9	CH_ZH (3), CH_ECS (1), CH (2), TW_GE (2), TW_D (2), TW_K (3), TW_ E (3), TW_FG (1), TW_T (11), TW_KDG (6)
	MW898483	10	CH_ZH (1), CH_ECS (1), CH (1), TW_D (2), TW_T (6), TW_KDG (2)
	MW898484	11	CH_ZH (1), CH_ECS (1), CH (2), TW_D (1), TW_E (3), TW_T (5), TW_KDG (4)
	MW898485	12	CH_ZH (1), CH_ECS (1), CH (1), TW_GE (1), TW_D (1), TW_K (2), TW_E (1), TW_T (9), TW_KDG (2)
	MW898486	13	CH_DL (1)
	MW898487	14	TW_K (1)
	MW898488	15	TW_K (1)
	MW898489	16	CH_YS (1), CH_ZH (1), TW_GE (1), TW_K (2), TW_T (2)
	MW898490	17	TW_FG (1)
	MW898491	18	TW_GE (1)
	MW898492	19	TW_GE (1)
	MW898493	20	TW_ E (1)
	MW898494	21	TW_ E (1)
	MW898495	22	TW_ E (1)
	MW898496	23	CH_ECS (1), CH_SCS (1)
	MW898497	24	CH_ECS (1)
	MW898498	25	CH_ZH (1), CH_ECS (1)
	MW898499	26	CH_ECS (1)
	MW898500	27	CH_ECS (1), TW_T (3), TW_KDG (1)
	MW898501	28	CH_ECS (1)
	MW898502	29	CH_YS (1)
	MW898503	30	TW_KDG (1)
	MW898504	31	TW_KDG (1)
	MW898505	32	CH (1), TW_KDG (1)
	MW898506	33	TW_KDG (1)
	MW898507	34	TW_KDG (1)
	MW898508	35	TW_T (1), TW_KDG (1)
	MW898509	36	CH_ZH (1), TW_KDG (1)
	MW898510	37	TW_KDG (1)
	MW898511	38	TW_KDG (1)
	MW898512	39	TW_KDG (1)
	MW898513	40	TW_KDG (1)
	MW898514	41	TW_T (1)
	MW898515	42	TW_T (1)
	MW898516	43	TW_T (1)
	MW898517	44	TW_T (1)
	MW898518	45	TW_T (1)
	MW898519	46	TW_T (1)
	MW898520	47	TW_T (1)
	MW898521	48	TW_T (1)
	MW898522	49	CH_ECS (1), CH (1), TW_T (1)
	MW898523	50	CH (1), TW_T (1)
	MW898524	51	TW_T (1)
	MW898525	52	TW_T (1)
	MW898526	53	CH_ZH (2), TW_T (1)
	MW898527	54	TW_T (1)
	MW898528	55	TW_T (1)
	MW898529	56	CH_SCS (1)
	MW898530	57	CH_ECS (1)
	MW898531	58	CH_ZH (1), CH_ECS (1)
	MW898532	59	CH_SD (1)
	MW898533	60	CH_SD (1)
	MW898534	61	CH_ZH (1)
	MW898535	62	CH_ZH (1)
	MW898536	63	CH_ZH (1)
	MW898537	64	CH_ZH (1)
	MW898538	65	CH_ZH (1)
T. lepturus	MW898460	1	US_E (4)	Group 3
	MW898461	2	MX (2), BR (10)	Group 3
	MW898462	3	AF (5)	Group 2
	MW898463	4	AF (1)	Group 2
	MW898464	5	AF (1)	Group 2
	MW898465	6	AF (1)	Group 2
	MW898466	7	AF (2)	Group 2
	MW898467	8	TW_D (1), TW_K (1), TW_E (4), TW_FG (13), TW_T (46), TW_KDG (33), CH_SCS (11)	Group 1
	MW898468	9	US_W (1)	Group 4
	MW898469	10	US_E (1)	Group 3
	MW898470	11	OM (3)	Group 1
	MW898471	12	TW_KDG (2)	Group 1
	MW898472	13	TW_KDG (1)	Group 1
	MW898473	14	TW_KDG (1)	Group 1
T. nanhaiensis	MW898539	1	JP (10), TW_GE (2), TW_E (16), TW_T (12), TW_KDG (34), CH_SCS (2)	Group 1
	MW898540	2	CH_SCS (3)	Group 1
	MW898541	3	CH_SCS (2)	Group 1
	MW898542	4	CH_SCS (2)	Group 1
	MW898543	5	CH_SCS (3)	Group 1
	MW898544	6	IN (6)	Group 2
	MW898545	7	OM (2)	Group 2
	MW898546	8	OM (1)	Group 2
	MW898547	9	OM (3)	Group 2
	MW898548	10	PK (2)	Group 2
	MW898549	11	PK (1)	Group 2
	MW898550	12	PK (1)	Group 2
	MW898551	13	TH (2)	Group 2
	MW898552	14	TW_E (6), TW_T (7), TW_KDG (12), CH_SCS (1)	Group 1
	MW898553	15	TW_E (1)	Group 1
	MW898554	16	CH_SCS (1)	Group 1
	MW898555	17	TW_KDG (1), CH_SCS (1)	Group 1
	MW898556	18	PS (3), OM (1), PK (1)	Group 2
	MW898557	19	PS (1), OM (1)	Group 2
	MW898558	20	PS (1)	Group 2
	MW898559	21	TW_KDG (1)	Group 1
	MW898560	22	TW_KDG (2)	Group 1
	MW898561	23	TW_KDG (1)	Group 1
	MW898562	24	TW_KDG (1)	Group 1
	MW898563	25	TW_T (1)	Group 1
	MW898564	26	PS (1)	Group 2
	MW898565	27	PS (1)	Group 2
