# Supplementary material for: Variation in global distribution, population structures, and demographic history for four Trichiurus cutlassfishes
Source: PeerJ. 2021 Dec 15;9:e12639. doi: 10.7717/peerj.12639 (PMC8684317; doi:10.7717/peerj.12639)
Supplement: Supplemental Information 2 — The numbers in parentheses are 95% credible interval. [file peerj-09-12639-s002.xlsx]

## Sheet: 工作表1
Table S2. Summary of estimated medium node age (mya) of trichiurus species based on two different node constrains. The numbers in parentheses are 95% HPD interval.
	Miya et al. 2013	Friedman et al. 2019
MRCA of Trichiuridae	59.50 (52.07-62.50)	42.28 (36.43-47.41)
MRCA of Trichiurus	27.81 (21.05-33.77)	19.66 (15.00-24.75)
MRCA of T. brevis	4.21 (1.89-5.93)	2.58 (1.35-4.25)
MRCA of T. nanhaiensis	6.69 (3.85-8.58)	4.36 (2.77-6.28)
MRCA of T. japonicus	5.84 (3.59-7.00)	3.73 (2.58-5.14)
MRCA of T. lepturus	5.68 (3.04-7.44)	3.61 (2.77-6.28)
MRCA of T. japonicus and T. lepturus	14.96 (9.97-18.90)	10.32 (7.17-13.74)
MRCA of T. lepturus Group 3 and 4	3.36 (1.11-4.55)	1.94 (0.77-3.30)
MRCA of T. lepturus Group 3+4 and 1	4.65 (2.29-6.10)	2.87 (1.60-4.37)
